# Supplementary material for: Intensive Care Unit Rotations and Predictors of Career Choice in Pulmonary/Critical Care Medicine: A Survey of Internal Medicine Residency Directors
Source: Hindawi journal article supplement (doi:10.1155/2018/9496241), 2018-01-01
Supplement: f1 [file 9496241.f1.pdf]

# Program Director Survey

Please complete the survey below.

Thank you!

---

---

## GENERAL INFORMATION ABOUT THE RESIDENCY PROGRAM

Which of the following terms best describes your residency program? (choose one)

- ☐ University-sponsored or university-based
- ☐ Community-sponsored or community-based

Which of the following terms best describes your residency program? (choose one)

- ☐ Urban
- ☐ Suburban
- ☐ Rural

How many residents make up each graduating class?

\_\_\_\_\_

---

---

## ICU DEMOGRAPHICS & RESOURCES

Please characterize your principle university-affiliated MEDICAL ICU

- ☐ MICU
- ☐ MICU/CCU
- ☐ MICU/SICU
- ☐ Other

If other, please describe.

\_\_\_\_\_

What best describes the staffing pattern of this ICU?

- ☐ Open
- ☐ Closed
- ☐ Semi-open (mandatory critical care consult on most/all patients)

How many beds are available in this ICU?

- ☐ Less than 10
- ☐ 10-20
- ☐ More than 20
- ☐ Don't know

---

**How many months (on average) of dedicated ICU rotations do residents do during each year?**

---

PGY-1 \_\_\_\_\_

PGY-2 \_\_\_\_\_

PGY-3 \_\_\_\_\_

---

**EDUCATION METHODS & RESOURCES**

Is there a faculty physician responsible for overseeing/organizing resident education in this ICU?

☐ Yes ☐ No ☐ Don't know

Do residents receive didactic training on standard ICU topics when they are rotating through this ICU?

☐ Yes ☐ No ☐ Don't know

Is there a core curriculum of ICU topics available online for the residents during this rotation?

☐ Yes ☐ No ☐ Don't know

Who does most of the resident teaching when they rotate through this ICU? (choose one)

- ☐ Attendings  
☐ Fellows  
☐ Residents themselves  
☐ Other staff  
☐ Everyone contributes equally  
☐ It differs among rotations  
☐ Don't know

Please check which of the following educational methods are used to teach residents when rotating through this ICU (Check all that apply).

- ☐ Didactic lectures  
☐ Informal talks ("chalk-talks") in the ICU  
☐ Bedside teaching during rounds  
☐ Residents present topics  
☐ Outside reading  
☐ Simulated procedures training  
☐ Audiovisual aids (e.g. slides)  
☐ Other

How likely is it that residents receive formal training (either by simulation, bedside teaching, lectures) in invasive procedures (e.g. central line placement) during this ICU rotation?

- ☐ Extremely likely  
☐ Very likely  
☐ Very unlikely  
☐ Extremely unlikely

On average, how many central lines do residents perform by graduation?

\_\_\_\_\_

Do residents serve as hospital code leaders during their ICU rotations?

- ☐ Yes  
☐ No  
☐ Don't know

During the week, approximately how much time (in minutes) is spent every day teaching residents in this ICU?

\_\_\_\_\_

Approximately what percent (%) of ICU rounds' time is spent on teaching?

---

---

---

## ICU TEAM STRUCTURE

At your institution, which intensivist attendings play a larger role in delivery of critical care medicine education and mentoring to the residents? (select one)

PCCM = Pulmonary/critical care medicine

- ☐ PCCM
- ☐ Non-PCCM faculty
- ☐ Roughly equal
- ☐ Don't know

How many attending physicians are there per ICU team?

- ☐ 1
- ☐ 2
- ☐ More than 2

What specialties of physicians serve as attendings on the ICU teaching services?

(choose all that apply)

- ☐ Pulmonary/CCM
- ☐ Anesthesia
- ☐ Surgery
- ☐ Neurology
- ☐ Emergency Medicine/CCM
- ☐ Hospital Medicine/Internal Medicine
- ☐ Other

What specialties of physicians spend the most time as attendings on the ICU teaching services?

- ☐ PCCM
- ☐ Non-PCCM faculty
- ☐ Roughly equal
- ☐ Don't know

Are midlevel providers (Nurse practitioners or physician's assistants) part of the ICU team?

- ☐ Yes
- ☐ No
- ☐ Don't know

---

---

## Number of residents per team (on average)

PGY-1

---

PGY-2

---

PGY-3

---

Are residents/fellows from other specialties (i.e. anesthesia, surgical specialties) ever part of the rounding ICU team?

- ☐ Yes
- ☐ No
- ☐ Don't know

---

---

## FELLOWSHIP CHOICES OF RESIDENTS

What percentage of graduating internal medicine residents go on to pursue subspecialty fellowship training?

---

What percentage of graduating internal medicine residents go on to pursue a fellowship in pulmonary/critical care medicine?

---
